# Supplementary material for: Unveiling the Oxazolidine Character of Pseudoproline Derivatives by Automated Flow Peptide Chemistry
Source: MDPI journal article supplement (doi:10.3390/ijms25084150), 2024-04-09
Supplement: s1 [file s1]

# Unveiling the Oxazolidine Character of Pseudoproline Derivatives by Automated Flow Peptide Chemistry

Szebasztián Szaniszló <sup>1,2</sup>, Antal Csámpai <sup>3</sup>, Dániel Horváth <sup>1</sup>, Richárd Tomecz <sup>1</sup>, Viktor Farkas <sup>4,\*</sup> and András Perczel <sup>1,4,\*</sup>

<sup>1</sup> Laboratory of Structural Chemistry and Biology, Institute of Chemistry, ELTE Eötvös Loránd University, Pázmány Péter Sétány 1/A, 1117 Budapest, Hungary

<sup>2</sup> ELTE Hevesy György Ph.D. School of Chemistry, ELTE Eötvös Loránd University, Pázmány Péter Sétány 1/A, 1117 Budapest, Hungary

<sup>3</sup> Institute of Chemistry, ELTE Eötvös Loránd University, Pázmány Péter Sétány 1/A, 1117 Budapest, Hungary

<sup>4</sup> HUN-REN—ELTE Protein Modeling Research Group, ELTE Eötvös Loránd University, Pázmány Péter Sétány 1/A, 1117 Budapest, Hungary

\* Correspondence: farkas.viktor@ttk.elte.hu (V.F.); perczel.andras@ttk.elte.hu (A.P.)

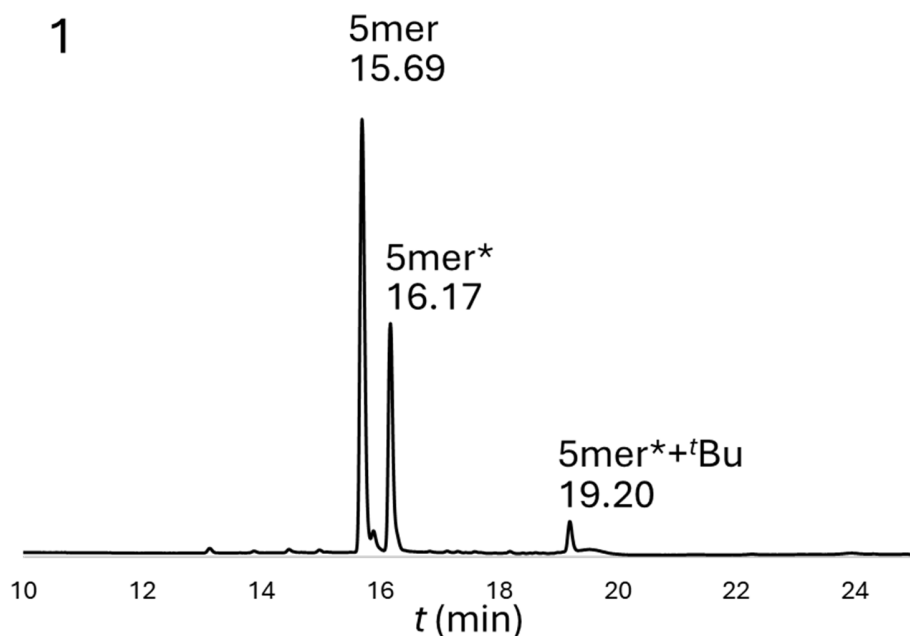

**Figure S1:** UPLC chromatogram of the crude peptide with key molecules assigned from synthesis #1 (see Table 2 for more details).

**Table S1.** Calculated and measured monoisotopic masses of molecules from synthesis #1.

| Name                         | Retention time (min) | Calculated monoisotopic mass | Measured monoisotopic mass | Mass error (ppm) |
|------------------------------|----------------------|------------------------------|----------------------------|------------------|
| <b>5mer</b>                  | 15.69                | 576.314                      | 576.304                    | 17.352           |
| <b>5mer*</b>                 | 16.17                | 616.345                      | 616.338                    | 11.357           |
| <b>5mer*+ <sup>t</sup>Bu</b> | 19.20                | 672.407                      | 672.287                    | 178.463          |

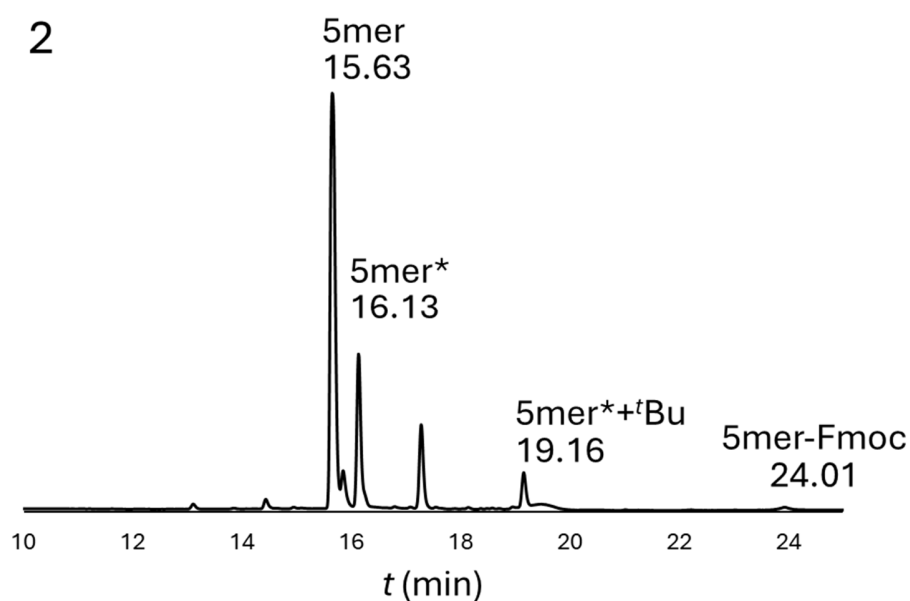

**Figure S2:** UPLC chromatogram of the crude peptide with key molecules assigned from synthesis #2 (see Table 2 for more details).

**Table S2.** Calculated and measured monoisotopic masses of molecules from synthesis #2.

| Name                         | Retention time (min) | Calculated monoisotopic mass | Measured monoisotopic mass | Mass error (ppm) |
|------------------------------|----------------------|------------------------------|----------------------------|------------------|
| <b>5mer</b>                  | 15.63                | 576.314                      | 576.304                    | 17.352           |
| <b>5mer*</b>                 | 16.13                | 616.345                      | 616.338                    | 11.357           |
| <b>5mer*+ <sup>t</sup>Bu</b> | 19.16                | 672.407                      | 672.287                    | 178.463          |
| <b>5mer-Fmoc</b>             | 24.01                | 798.382                      | 798.378                    | 5.010            |

3

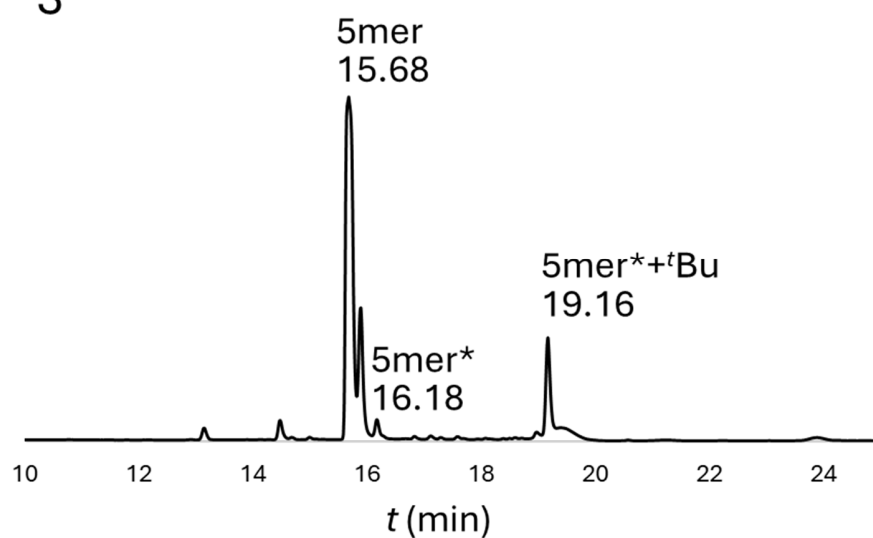

**Figure S3:** UPLC chromatogram of the crude peptide with key molecules assigned from synthesis #3 (see Table 2 for more details).

**Table S3.** Calculated and measured monoisotopic masses of molecules from synthesis #3.

| Name                   | Retention time (min) | Calculated monoisotopic mass [M+H] <sup>+</sup> | Measured monoisotopic mass [M+H] <sup>+</sup> | Mass error (ppm) |
|------------------------|----------------------|-------------------------------------------------|-----------------------------------------------|------------------|
| 5mer                   | 15.68                | 576.314                                         | 576.304                                       | 17.352           |
| 5mer*                  | 16.18                | 616.345                                         | 616.320                                       | 40.562           |
| 5mer*+ <sup>t</sup> Bu | 19.16                | 672.407                                         | 672.268                                       | 206.720          |

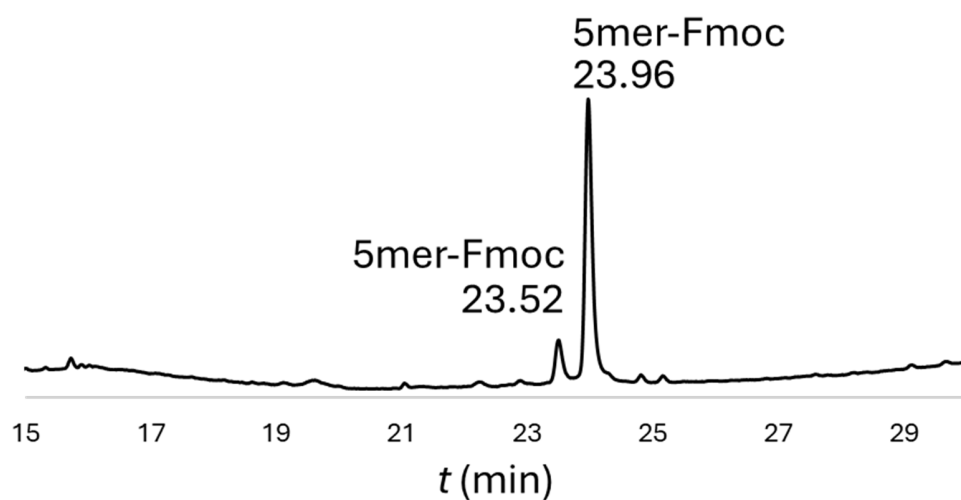

**Figure S4:** UPLC chromatogram of the crude peptide with key molecules assigned from synthesis #4 (see Table 2 for more details).. The two different peaks refer to the *cis* or *trans* orientation of the Fmoc group.

**Table S4.** Calculated and measured monoisotopic masses of molecules from synthesis #4.

| Name      | Retention time (min) | Calculated monoisotopic mass $[M+H]^+$ | Measured monoisotopic mass $[M+H]^+$ | Mass error (ppm) |
|-----------|----------------------|----------------------------------------|--------------------------------------|------------------|
| 5mer-Fmoc | 23.52                | 798.382                                | 798.378                              | 5.010            |
| 5mer-Fmoc | 23.96                | 798.382                                | 798.378                              | 5.010            |

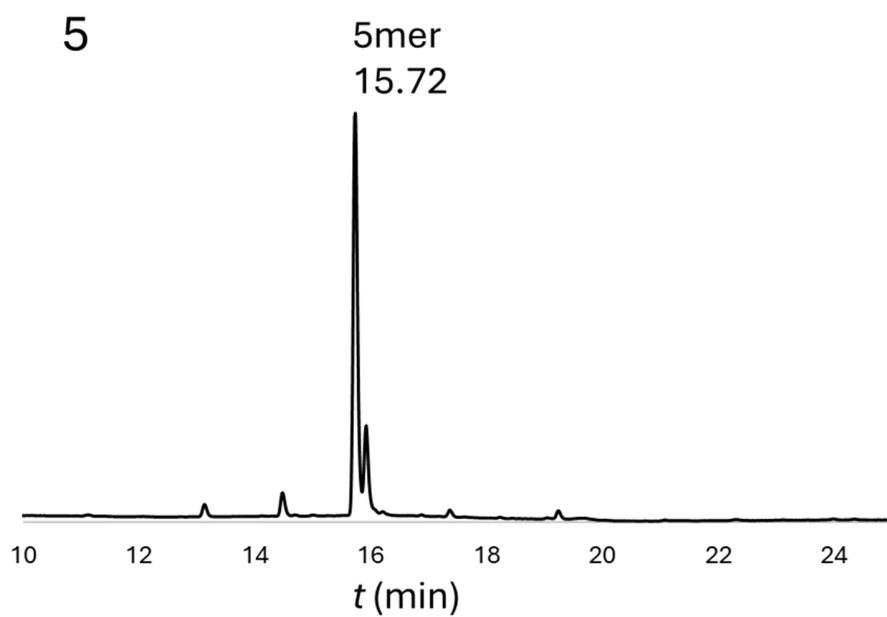

**Figure S5:** UPLC chromatogram of the crude peptide with key molecules assigned from synthesis #5 (see Table 2 for more details).

**Table S5.** Calculated and measured monoisotopic masses of molecules from synthesis #5.

| Name | Retention time (min) | Calculated monoisotopic mass [M+H] <sup>+</sup> | Measured monoisotopic mass [M+H] <sup>+</sup> | Mass error (ppm) |
|------|----------------------|-------------------------------------------------|-----------------------------------------------|------------------|
| 5mer | 15.72                | 576.3140                                        | 576.375                                       | -105.845         |

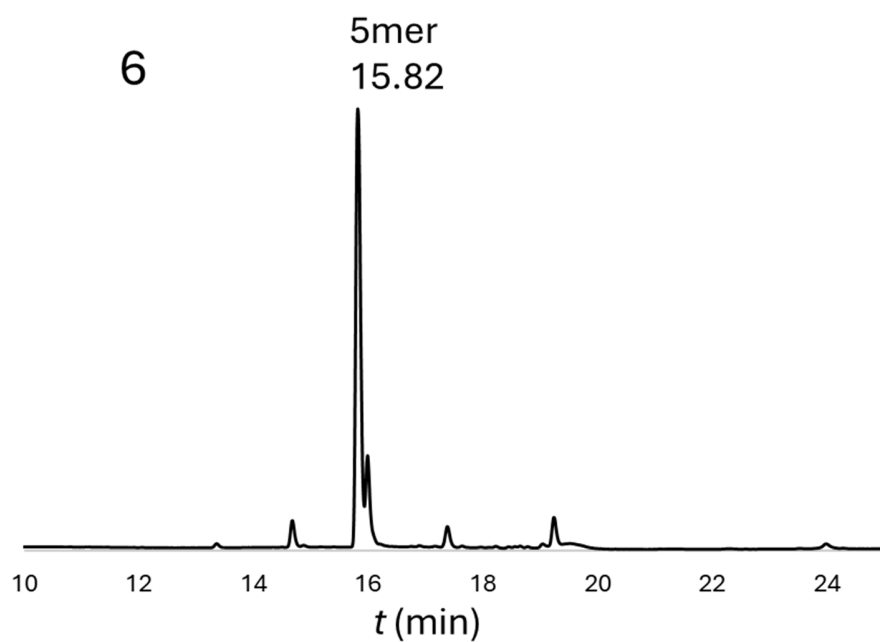

**Figure S6:** UPLC chromatogram of the crude peptide with key molecules assigned from synthesis #6 (see Table 2 for more details).

**Table S6.** Calculated and measured monoisotopic masses of molecules from synthesis #6.

| Name | Retention time (min) | Calculated monoisotopic mass $[M+H]^+$ | Measured monoisotopic mass $[M+H]^+$ | Mass error (ppm) |
|------|----------------------|----------------------------------------|--------------------------------------|------------------|
| 5mer | 15.82                | 576.3140                               | 576.393                              | -137.078         |

7

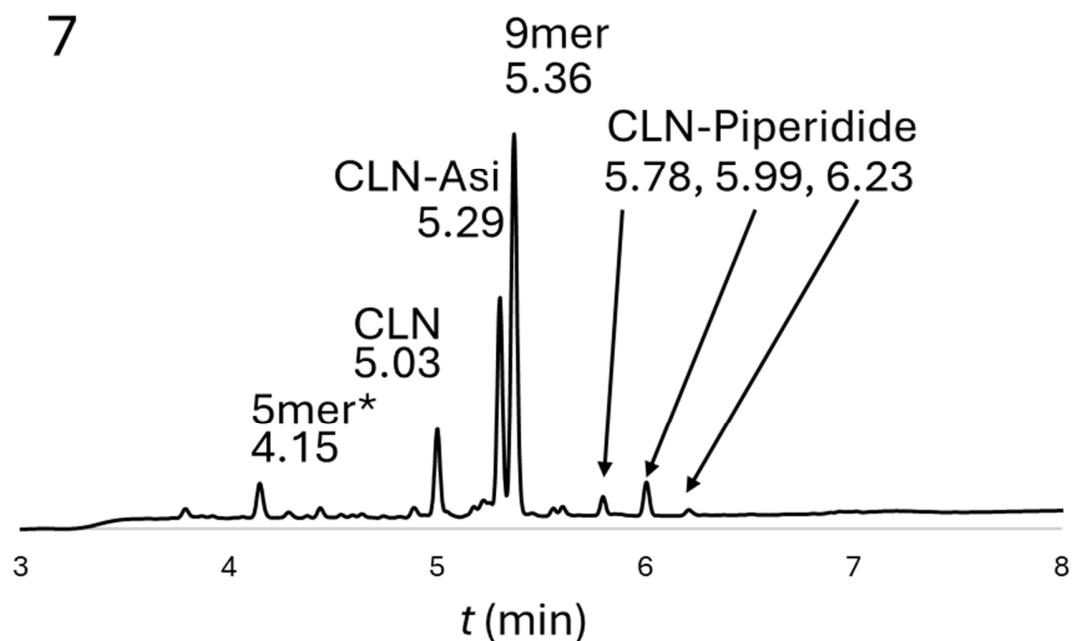

**Figure S7:** UPLC chromatogram of the crude peptide with key molecules assigned from synthesis #7 (see Table 3 for more details).

**Table S7.** Calculated and measured monoisotopic masses of molecules from synthesis #7.

| Name              | Retention time (min) | Calculated monoisotopic mass $[M+H]^+$ | Measured monoisotopic mass $[M+H]^+$ | Mass error (ppm) |
|-------------------|----------------------|----------------------------------------|--------------------------------------|------------------|
| <b>5mer*</b>      | 4.15                 | 616.345                                | 616.338                              | 11.357           |
| <b>CLN</b>        | 5.03                 | 1163.573                               | 1163.563                             | 8.594            |
| <b>CLN-Asi</b>    | 5.29                 | 1145.562                               | 1145.552                             | 8.729            |
| <b>9mer</b>       | 5.36                 | 1048.546                               | 1048.538                             | 7.630            |
| <b>Piperidide</b> | 5.78, 5.99, 6.23     | 1230.651                               | 1230.640                             | 8.938            |

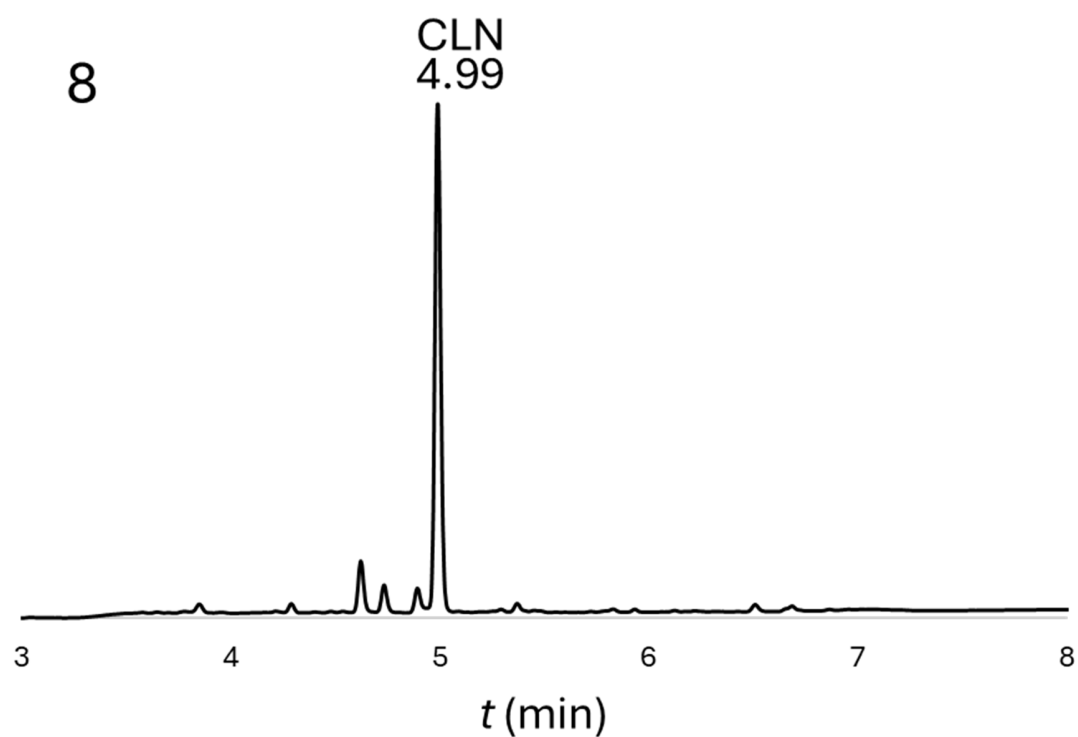

**Figure S8:** UPLC chromatogram of the crude peptide with key molecules assigned from synthesis #8 (see Table 3 for more details).

**Table S8.** Calculated and measured monoisotopic masses of molecules from synthesis #8.

| Name       | Retention time (min) | Calculated monoisotopic mass $[M+H]^+$ | Measured monoisotopic mass $[M+H]^+$ | Mass error (ppm) |
|------------|----------------------|----------------------------------------|--------------------------------------|------------------|
| 5mer*      | -                    | 616.345                                | -                                    | -                |
| CLN        | 4.99                 | 1163.573                               | 1163.541                             | 27.501           |
| CLN-Asi    | -                    | 1145.562                               | -                                    | -                |
| 9mer       | -                    | 1048.546                               | -                                    | -                |
| Piperidide | -                    | 1230.651                               | -                                    | -                |



9

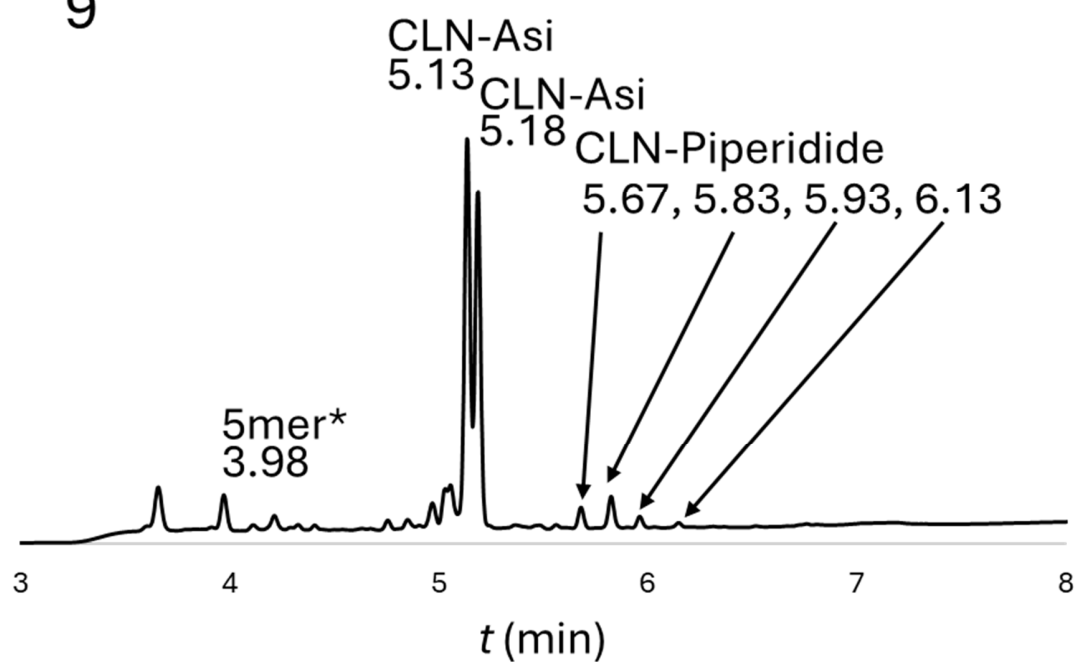

**Figure S9:** UPLC chromatogram of the crude peptide with key molecules assigned from synthesis #9. In this instance, it is important to note that the peptide contains Ser rather than Thr at the 6th position. (see Table 3 for more details).

**Table S9.** Calculated and measured monoisotopic masses of molecules from synthesis #9.

| Name       | Retention time (min)   | Calculated monoisotopic mass [M+H] <sup>+</sup> | Measured monoisotopic mass [M+H] <sup>+</sup> | Mass error (ppm) |
|------------|------------------------|-------------------------------------------------|-----------------------------------------------|------------------|
| 5mer*      | 3.98                   | 602.329                                         | 602.314                                       | 24.903           |
| CLN        | -                      | 1149.557                                        | -                                             | -                |
| CLN-Asi    | 5.13, 5.18             | 1131.546                                        | 1131.518                                      | 24.745           |
| 9mer       | -                      | 1034.530                                        | -                                             | -                |
| Piperidide | 5.67, 5.83, 5.93, 6.13 | 1216.636                                        | 1216.605                                      | 25.480           |

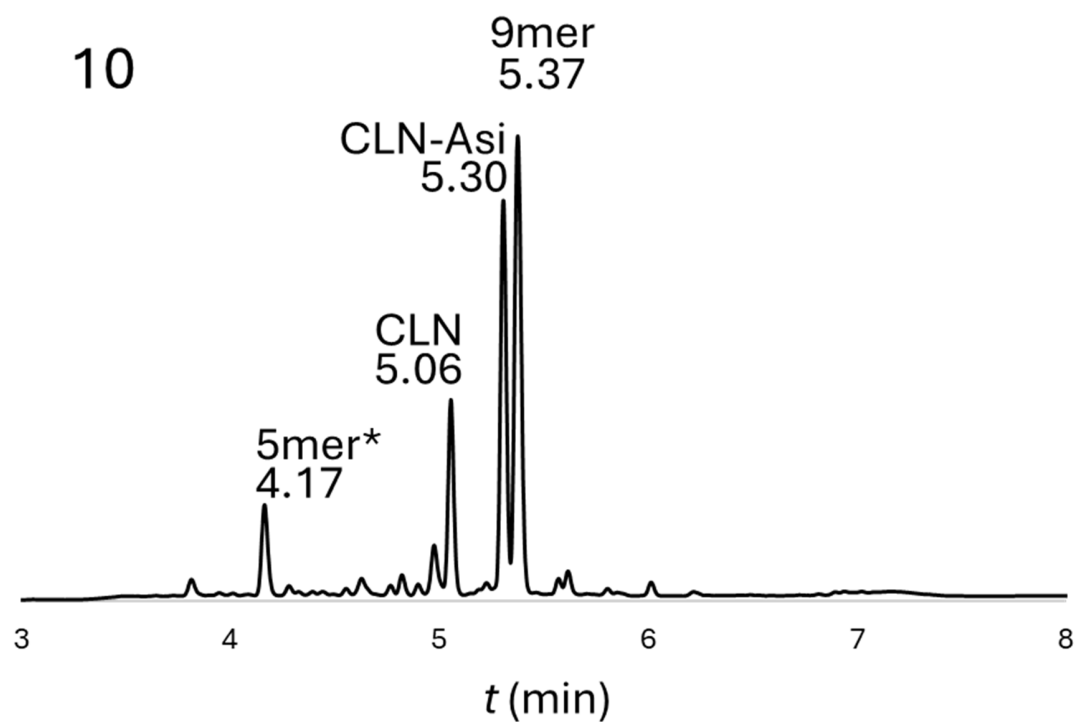

**Figure S10:** UPLC chromatogram of the crude peptide with key molecules assigned from synthesis #10 (see Table 3 for more details).

**Table S10.** Calculated and measured monoisotopic masses of molecules from synthesis #10.

| Name       | Retention time (min) | Calculated monoisotopic mass $[M+H]^+$ | Measured monoisotopic mass $[M+H]^+$ | Mass error (ppm) |
|------------|----------------------|----------------------------------------|--------------------------------------|------------------|
| 5mer*      | 4.17                 | 616.345                                | 616.345                              | 0.000            |
| CLN        | 5.06                 | 1163.573                               | 1163.572                             | 0.859            |
| CLN-Asi    | 5.30                 | 1145.562                               | 1145.566                             | -3.492           |
| 9mer       | 5.37                 | 1048.546                               | 1048.547                             | -0.954           |
| Piperidide |                      | 1230.651                               | -                                    | -                |

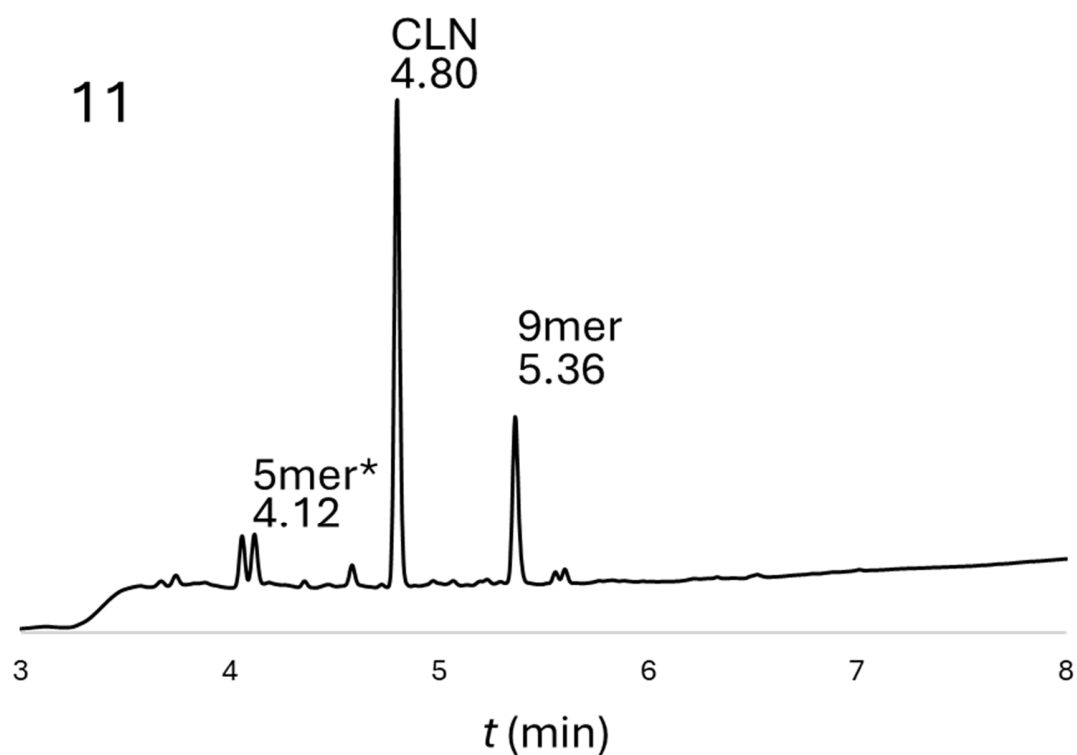

**Figure S11:** UPLC chromatogram of the crude peptide with key molecules assigned from synthesis #11 (see Table 3 for more details).

**Table S11.** Calculated and measured monoisotopic masses of molecules from synthesis #11.

| Name       | Retention time (min) | Calculated monoisotopic mass $[M+H]^+$ | Measured monoisotopic mass $[M+H]^+$ | Mass error (ppm) |
|------------|----------------------|----------------------------------------|--------------------------------------|------------------|
| 5mer*      | 4.12                 | 616.345                                | 616.341                              | 6.490            |
| CLN        | 4.80                 | 1162.589                               | 1162.584                             | 4.301            |
| CLN-Asi    | -                    | 1144.578                               | -                                    | -                |
| 9mer       | 5.36                 | 1048.546                               | 1048.543                             | 2.861            |
| Piperidide | -                    | 1230.651                               | -                                    | -                |

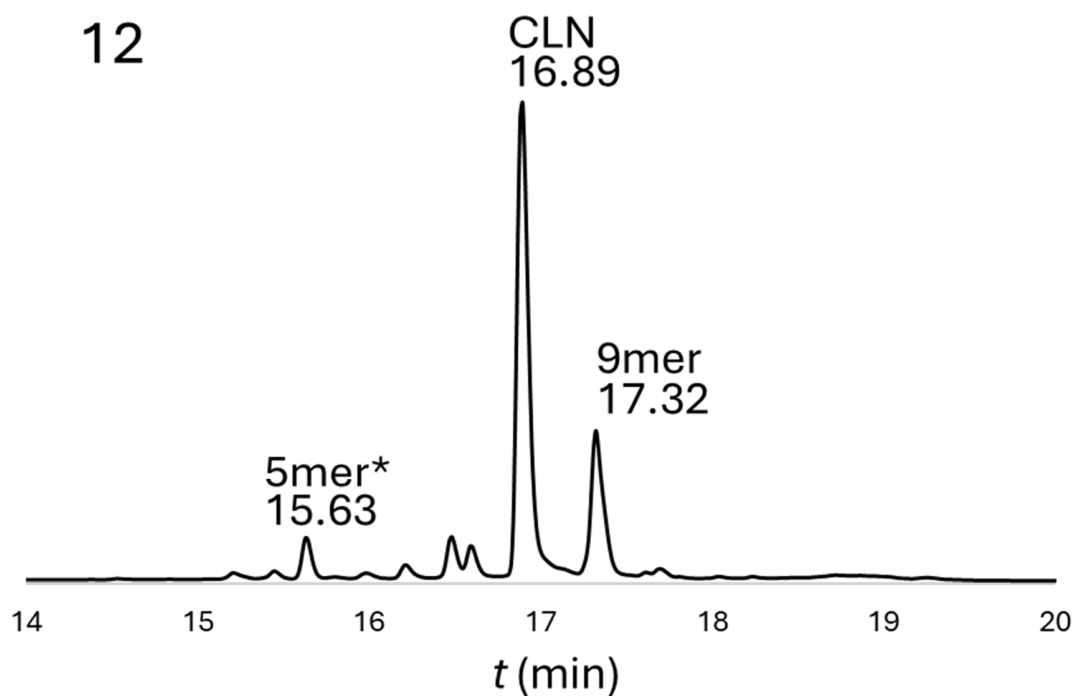

**Figure S12:** UPLC chromatogram of the crude peptide with key molecules assigned from synthesis #12 (see Table 3 for more details).. Different UPLC gradient was used (molecules are identified with MS)

**Table S12.** Calculated and measured monoisotopic masses of molecules from synthesis #12.

| Name       | Retention time (min) | Calculated monoisotopic mass [M+H] <sup>+</sup> | Measured monoisotopic mass [M+H] <sup>+</sup> | Mass error (ppm) |
|------------|----------------------|-------------------------------------------------|-----------------------------------------------|------------------|
| 5mer*      | 15.63                | 616.345                                         | 616.407                                       | -100.593         |
| CLN        | 16.89                | 1163.573                                        | 1163.686                                      | -97.115          |
| CLN-Asi    | -                    | 1145.562                                        | -                                             | -                |
| 9mer       | 17.32                | 1048.546                                        | 1048.658                                      | -106.815         |
| Piperidide | -                    | 1230.651                                        | -                                             | -                |

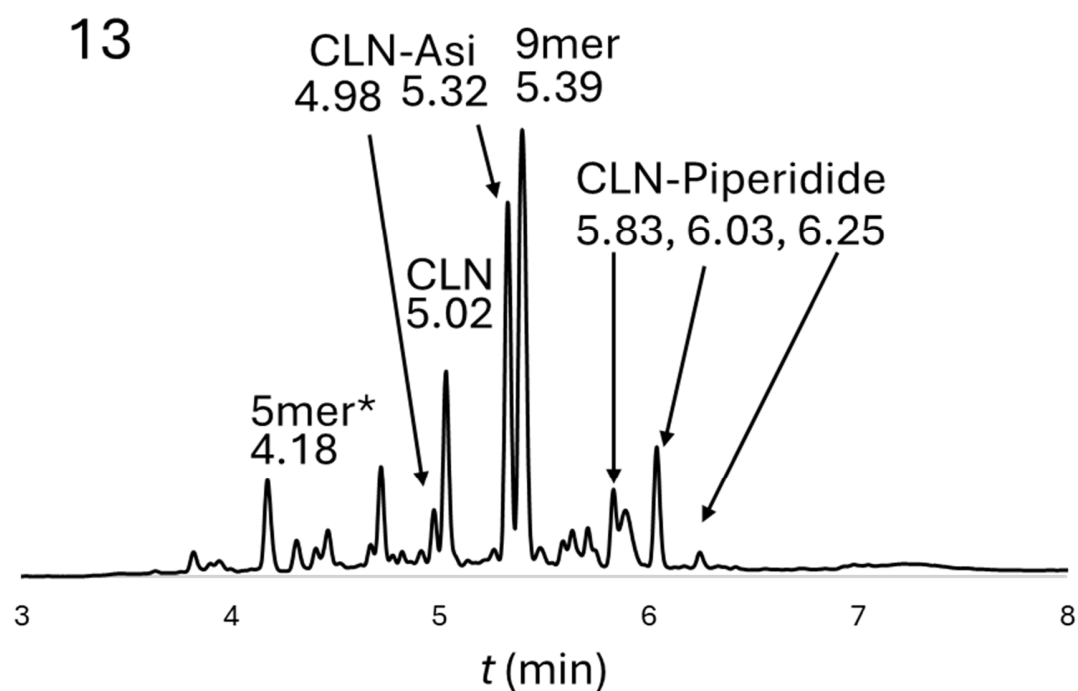

**Figure S13:** UPLC chromatogram of the crude peptide with key molecules assigned from synthesis #13 (see Table 3 for more details)..

**Table S13.** Calculated and measured monoisotopic masses of molecules from synthesis #13.

| Name       | Retention time (min) | Calculated monoisotopic mass $[M+H]^+$ | Measured monoisotopic mass $[M+H]^+$ | Mass error (ppm) |
|------------|----------------------|----------------------------------------|--------------------------------------|------------------|
| 5mer*      | 4.18                 | 616.345                                | 616.351                              | -9.735           |
| CLN        | 5.02                 | 1163.573                               | 1163.586                             | -11.172          |
| CLN-Asi    | 4.98, 5.32           | 1145.562                               | 1145.579                             | -14.840          |
| 9mer       | 5.39                 | 1048.546                               | 1048.560                             | -13.352          |
| Piperidide | 5.83, 6.03, 6.25     | 1230.651                               | 1230.668                             | -13.814          |

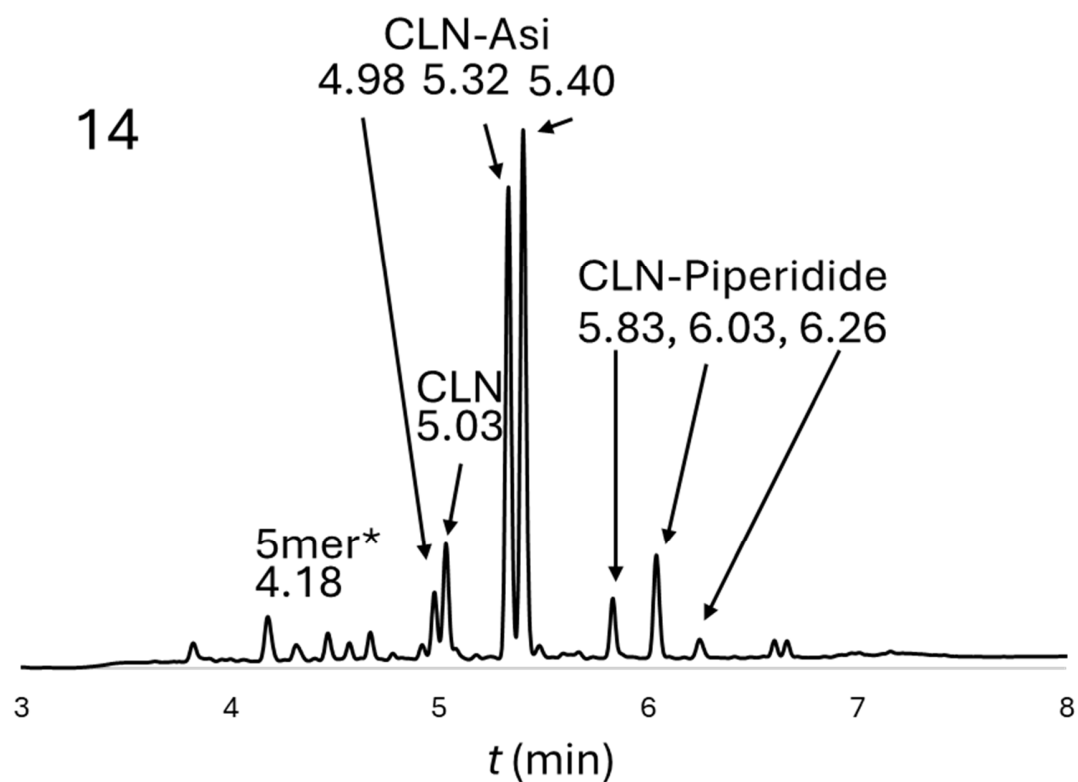

**Figure S14:** UPLC chromatogram of the crude peptide with key molecules assigned from synthesis #14 (see Table 3 for more details).

**Table S14.** Calculated and measured monoisotopic masses of molecules from synthesis #14.

| Name       | Retention time (min) | Calculated monoisotopic mass $[M+H]^+$ | Measured monoisotopic mass $[M+H]^+$ | Mass error (ppm) |
|------------|----------------------|----------------------------------------|--------------------------------------|------------------|
| 5mer*      | 4.18                 | 616.345                                | 616.351                              | -9.735           |
| CLN        | 5.03                 | 1163.573                               | 1163.591                             | -15.470          |
| CLN-Asi    | 4.98, 5.32, 5.4      | 1145.562                               | 1145.579                             | -14.840          |
| 9mer       | -                    | 1048.546                               | -                                    | -                |
| Piperidide | 5.83, 6.03, 6.26     | 1230.651                               | 1230.668                             | -13.814          |

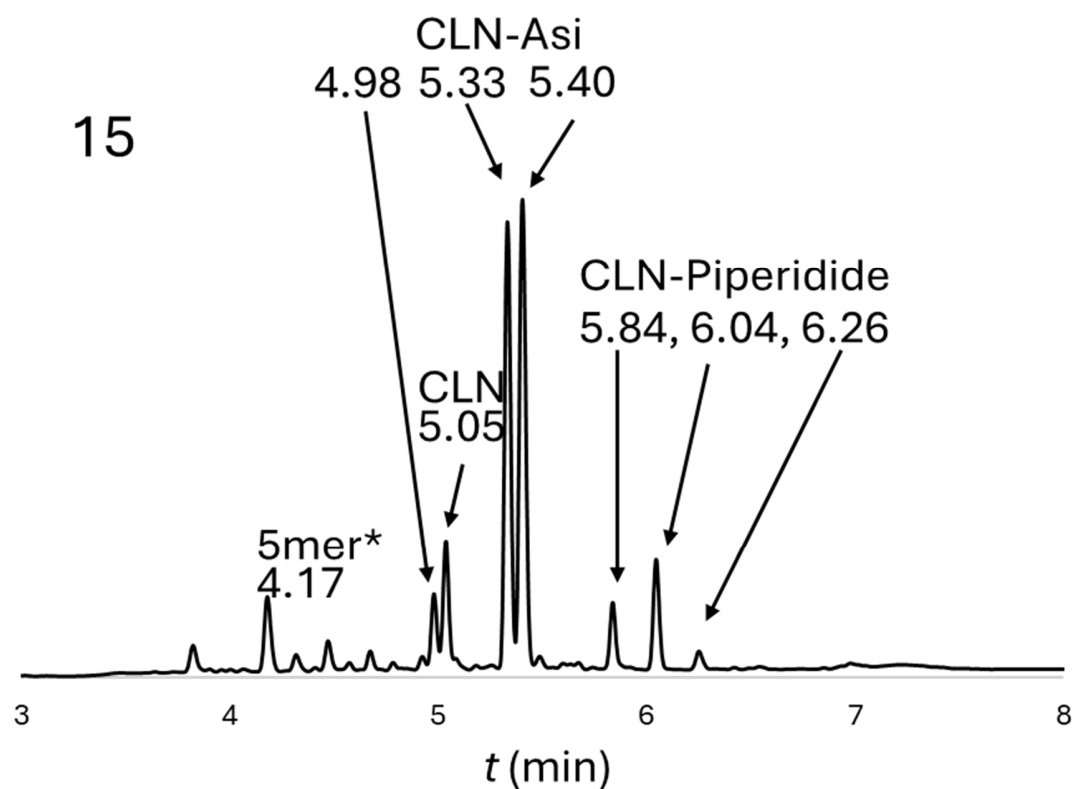

**Figure S15:** UPLC chromatogram of the crude peptide with key molecules assigned from synthesis #15 (see Table 3 for more details).

**Table S15.** Calculated and measured monoisotopic masses of molecules from synthesis #15.

| Name       | Retention time (min) | Calculated monoisotopic mass [M+H] <sup>+</sup> | Measured monoisotopic mass [M+H] <sup>+</sup> | Mass error (ppm) |
|------------|----------------------|-------------------------------------------------|-----------------------------------------------|------------------|
| 5mer*      | 4.17                 | 616.345                                         | 616.348                                       | -4.867           |
| CLN        | 5.05                 | 1163.573                                        | 1163.582                                      | -7.735           |
| CLN-Asi    | 4.98, 5.33, 5.4      | 1145.562                                        | 1145.570                                      | -6.983           |
| 9mer       | -                    | 1048.546                                        | -                                             | -                |
| Piperidide | 5.84, 6.04, 6.26     | 1230.651                                        | 1230.664                                      | -10.564          |

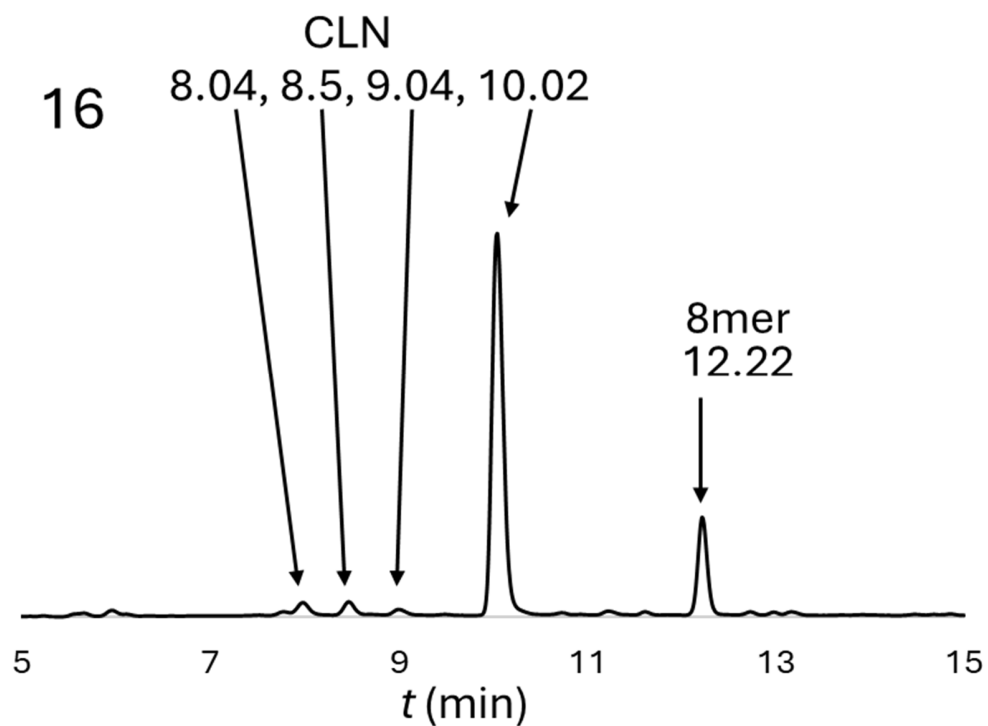

**Figure S16:** UPLC chromatogram of the crude peptide with key molecules assigned from synthesis #16 (see Table 3 for more details).

**Table S16.** Calculated and measured monoisotopic masses of molecules from synthesis #16.

| Name       | Retention time (min)   | Calculated monoisotopic mass $[M+H]^+$ | Measured monoisotopic mass $[M+H]^+$ | Mass error (ppm) |
|------------|------------------------|----------------------------------------|--------------------------------------|------------------|
| 5mer*      | -                      | 616.345                                | -                                    | -                |
| CLN        | 8.04, 8.5, 9.04, 10.02 | 1163.573                               | 1163.473                             | 85.942           |
| CLN-Asi    | -                      | 1145.562                               | -                                    | -                |
| 9mer       | -                      | 1048.546                               | -                                    | -                |
| Piperidide | -                      | 1230.651                               | -                                    | -                |
| 8mer       | 12.22                  | 947.498                                | 947.417                              | 85.488           |



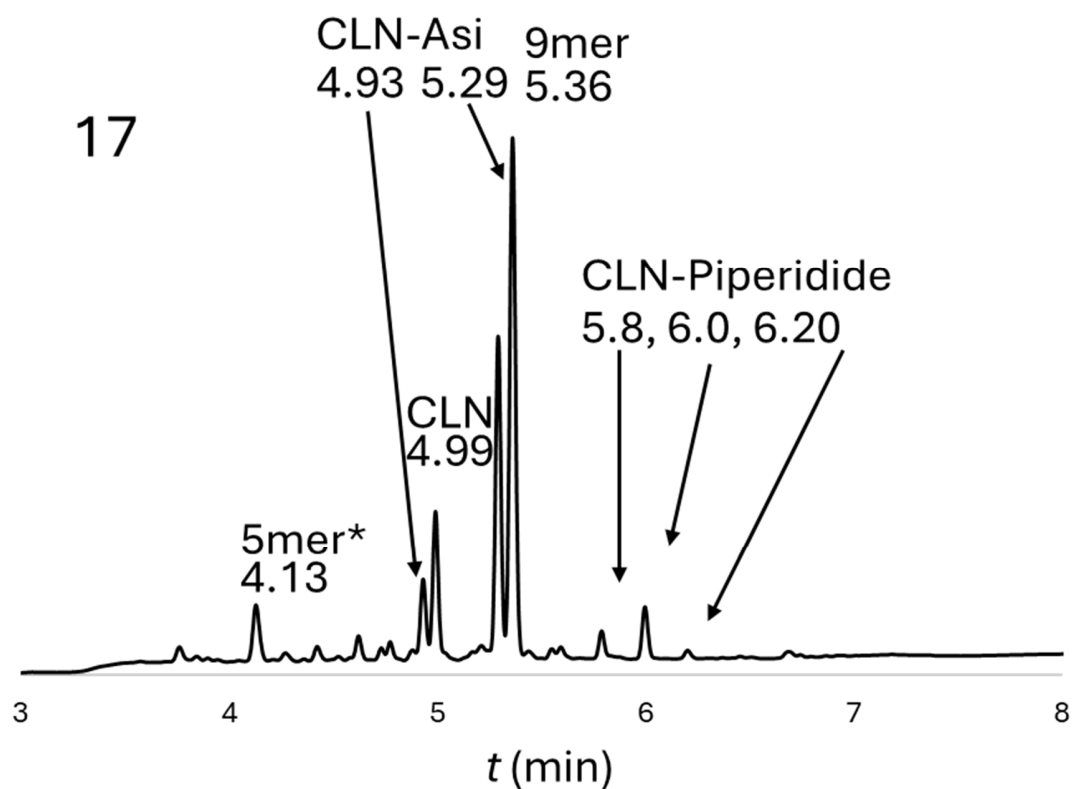

**Figure S17:** UPLC chromatogram of the crude peptide with key molecules assigned from synthesis #17 (see Table 3 for more details).

**Table S17.** Calculated and measured monoisotopic masses of molecules from synthesis #17.

| Name       | Retention time (min) | Calculated monoisotopic mass $[M+H]^+$ | Measured monoisotopic mass $[M+H]^+$ | Mass error (ppm) |
|------------|----------------------|----------------------------------------|--------------------------------------|------------------|
| 5mer*      | 4.13                 | 616.345                                | 616.325                              | 32.449           |
| CLN        | 4.99                 | 1163.573                               | 1163.535                             | 32.658           |
| CLN-Asi    | 4.93, 5.2            | 1145.562                               | 1145.525                             | 32.299           |
| 9mer       | 5.36                 | 1048.546                               | 1048.512                             | 32.426           |
| Piperidide | 5.8, 6.0, 6.2        | 1230.651                               | 1230.612                             | 31.691           |

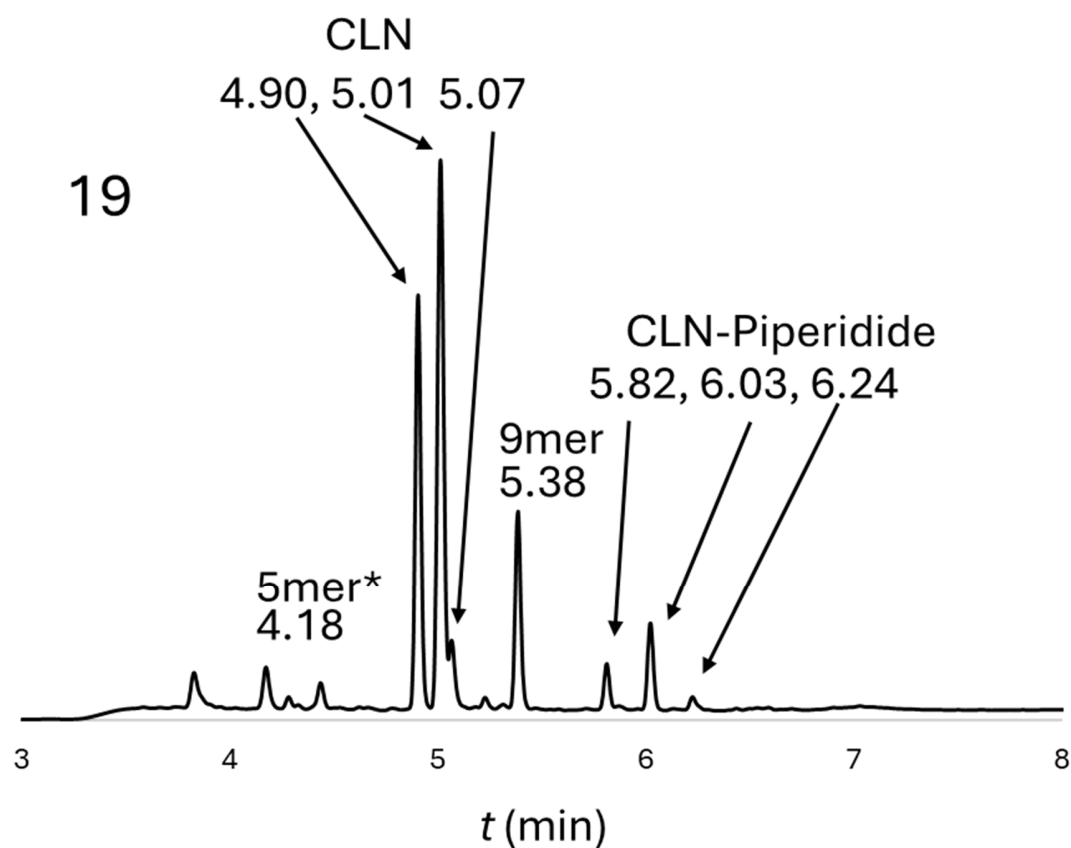

**Figure S18:** UPLC chromatogram of the crude peptide with key molecules assigned from synthesis #18 (see Table 3 for more details).

**Table S18.** Calculated and measured monoisotopic masses of molecules from synthesis #18.

| Name       | Retention time (min) | Calculated monoisotopic mass $[M+H]^+$ | Measured monoisotopic mass $[M+H]^+$ |         |
|------------|----------------------|----------------------------------------|--------------------------------------|---------|
| 5mer*      | 4.18                 | 616.345                                | 616.355                              | -16.225 |
| CLN        | 4.63, 4.77, 5.02     | 1163.573                               | 1163.591                             | -15.470 |
| CLN-Asi    | 4.95, 5.32, 5.39     | 1145.562                               | 1145.579                             | -14.840 |
| 9mer       | -                    | 1048.546                               | -                                    | -       |
| Piperidide | 5.82, 6.03, 6.24     | 1230.651                               | 1230.668                             | -13.814 |

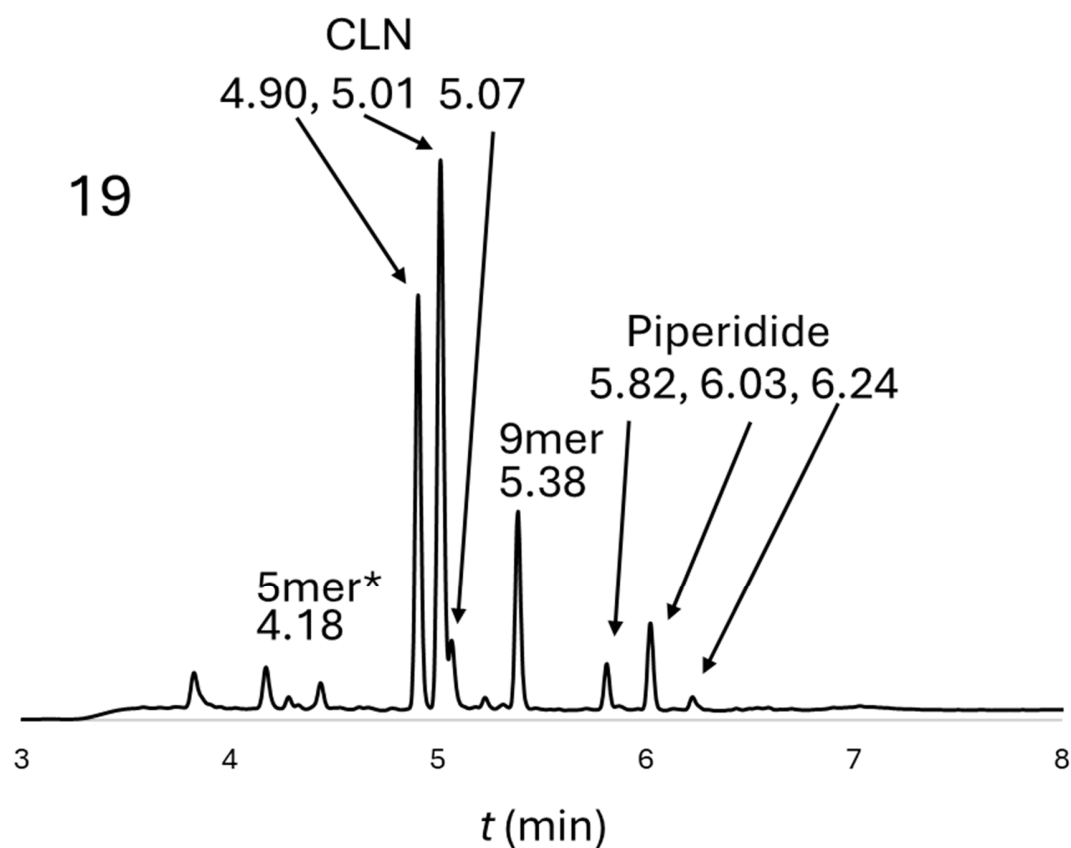

**Figure S19:** UPLC chromatogram of the crude peptide with key molecules assigned from synthesis #19 (see Table 3 for more details).

**Table S19.** Calculated and measured monoisotopic masses of molecules from synthesis #19.

| Name       | Retention time (min) | Calculated monoisotopic mass $[M+H]^+$ | Measured monoisotopic mass $[M+H]^+$ | Mass error (ppm) |
|------------|----------------------|----------------------------------------|--------------------------------------|------------------|
| 5mer*      | 4.18                 | 616.345                                | 616.341                              | 6.490            |
| CLN        | 4.9, 5.01, 5.07      | 1163.573                               | 1163.568                             | 4.297            |
| CLN-Asi    | -                    | 1145.562                               | -                                    | -                |
| 9mer       | 5.38                 | 1048.546                               | 1048.54                              | 5.722            |
| Piperidide | 5.82, 6.03, 6.24     | 1230.651                               | -                                    | -                |

### NMR Study of the CLN and CLN-Asi polypeptides

In **Figure S20 -A**, we can see the amide region of the CLN, where both threonine residues (Thr4 and Thr6) exhibit visible amide proton signals (**Figure S20-A** vertical column around 7.62 ppm, red square) with their respective sequential NOESY cross peaks designating the preceding and subsequent residues. In the suspected aspartimide peptide (Asi), the Thr6 amide proton signal was found to be missing, (**Figure S21-A**) however, the presence of a NOE peak (light green square at column of 8.58 ppm) between Thr6H $\alpha$ /H $\beta$  (5.15 ppm / 5.60 ppm) and Gly7H (8.58 ppm) amide proton indicates the presence of Thr6 side chains. This is only possible if the Thr6 amide proton is missing due to succinimide ring formation of the Asp5 residue, as shown in **Figure S21-A**.

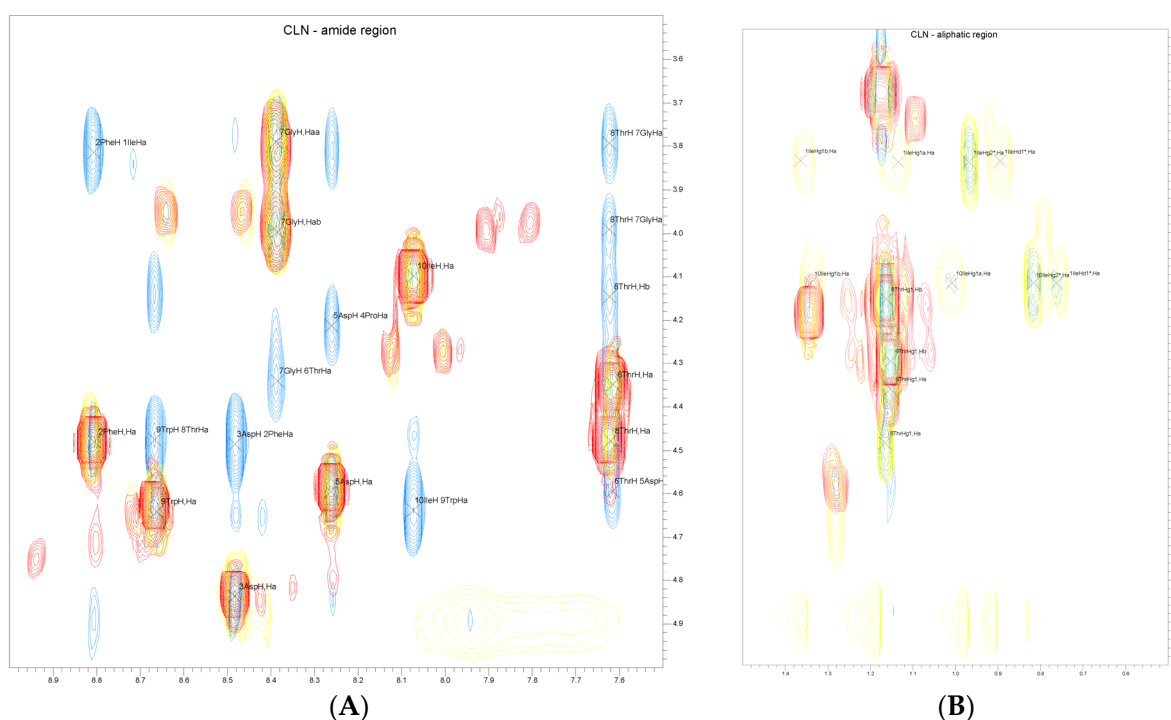

**Figure S20.** (A) The amide region of the CLN proton's NMR resonances: TOCSY/yellow, COSY/red, and NOESY/blue. (B) The side chain region with the proton signals of Thr6 and Thr8 residues marked.



**Table S20.** NMR shift list of CLN peptide.

|    |     | H    | HA         | HB         | HG               | HD         | HE          | HZ |
|----|-----|------|------------|------------|------------------|------------|-------------|----|
| 1  | Ile | -    | 3.81       | 1.95       | 1.36, 0.97, 1.13 | 0.9        | -           | -  |
| 2  | Phe | 8.81 | 4.48       | 2.64, 2.74 | -                | 6.88       | -           | -  |
| 3  | Asp | 8.48 | 4.84       | 2.92, 2.45 | -                | -          | -           | -  |
| 4  | Pro | -    | 4.21       | 2.32, 2.32 | 2.00, 2.00       | 3.81, 3.75 | -           | -  |
| 5  | Asp | 8.26 | 4.59       | 2.83, 2.83 | -                | -          | -           | -  |
| 6  | Thr | 7.62 | 4.35       | 4.28       | 1.15             | -          | -           | -  |
| 7  | Gly | 8.39 | 4.00, 3.79 | -          | -                | -          | -           | -  |
| 8  | Thr | 7.63 | 4.48       | 4.14       | 1.16             | -          | -           | -  |
| 9  | Trp | 8.66 | 4.64       | 3.24, 3.19 | -                | 7.22       | 10.19, 7.25 |    |
| 10 | Ile | 8.07 | 4.1        | 1.67       | 1.34, 1.00, 0.81 | 0.76       | -           | -  |

**Table S21.** NMR shift list of CLN-Asi peptide.

|    |     | H    | HA         | HB         | HG               | HD         | HE    | HZ   |
|----|-----|------|------------|------------|------------------|------------|-------|------|
| 1  | Ile | -    | 3.84       | 1.94       | 1.47, 1.18, 0.96 | 0.91       | -     | -    |
| 2  | Phe | 8.72 | 4.62       | 3.09, 2.96 | -                | 7.22       | 7.48  | -    |
| 3  | Asp | 8.35 | 4.8        | 2.45, 2.70 | -                | -          | -     | -    |
| 4  | Pro | -    | 4.24       | 2.20, 2.20 | 1.94, 1.94       | 3.46, 3.72 | -     | -    |
| 5  | Asp | 8.67 | 4.68       | 3.17, 2.80 | -                | -          | -     | -    |
| 6  | Thr | -    | 4.72       | 4.56       | 1.28             | -          | -     | -    |
| 7  | Gly | 8.56 | 3.92, 3.92 | -          | -                | -          | -     | -    |
| 8  | Thr | 7.96 | 4.29       | 4.12       | 1.14             | -          | -     | -    |
| 9  | Trp | 8.26 | 4.66       | 3.26, 3.26 | -                | 7.21       | 10.15 | 7.48 |
| 10 | Ile | 7.83 | 3.99       | 1.67       | 0.80, 1.30, 1.02 | 0.78       | -     | -    |

**Table S22.** Main parameter sets of the protocols described in Figure 1.

| Optimized parameters                                 |         | protocol s | protocol a | protocol b | protocol c |
|------------------------------------------------------|---------|------------|------------|------------|------------|
| <b>Fmoc-Xaa-OH</b>                                   | eq.     | 3          | 3          | 5          | 5          |
| <b>OxymaPure</b>                                     | eq.     | 3          | 3          | 5          | 5          |
| <b>DIC</b>                                           | eq.     | 6          | 6          | 6          | 10         |
| <b>Volume of injection</b>                           | mL      | 1          | 1          | 0.8        | 0.8        |
| <b>Flow rate</b>                                     |         |            |            |            |            |
| <b>Coupling / washing (after Fmoc- deprotection)</b> | mL/min. | 0.3/1      | 0.3/1      | 0.3/1      | 0.15/1     |
| <b>Cycle time</b>                                    | min.    | 7.5        | 12         | 12         | 18         |
| <b>Temperature</b>                                   | °C      | 80         | 80         | 80         | 80         |
